# Supplementary material for: Overexpression of MsSAG113 gene promotes leaf senescence in alfalfa via participating in the hormone regulatory network
Source: Front Plant Sci. 2022 Dec 8;13:1085497. doi: 10.3389/fpls.2022.1085497 (PMC9774027; doi:10.3389/fpls.2022.1085497)
Supplement: Supplementary Table 3 — Involved in hormone regulation genes in DEGs. [file Table_3.xlsx]

## Sheet: Sheet1
Query_id	Subject_id	Plant Hormones	Regulated			ABA	Auxin	Eth	GA	JA	SA
MsG0180005596.01	AT3G63210.1	abscisic acid	down		Up-regulated	33	31	14	10	29	28
MsG0280006429.01	AT4G34138.1	abscisic acid	down		Down-regulated	17	14	14	16	9	7
MsG0280008638.01	AT4G34131.1	abscisic acid	down		Total	50	45	28	26	38	35
MsG0280009182.01	AT4G18780.1	abscisic acid	down
MsG0380015339.01	AT3G12560.1	abscisic acid	down
MsG0380015943.01	AT4G21410.1	abscisic acid	down
MsG0480019427.01	AT4G34138.1	abscisic acid	down
MsG0580028492.01	AT2G31750.1	abscisic acid	down
MsG0680030908.01	AT2G31750.1	abscisic acid	down
MsG0680033540.01	AT5G27420.1	abscisic acid	down
MsG0480022286.01	AT5G51640.1	abscisic acid；ethylene	down
MsG0580025834.01	AT5G51640.1	abscisic acid；ethylene	down
MsG0680031146.01	AT5G51640.1	abscisic acid；ethylene	down
MsG0680031147.01	AT5G51640.1	abscisic acid；ethylene	down
MsG0280009128.01	AT1G14920.1	abscisic acid；ethylene；gibberellin	down
MsG0380015272.01	AT2G01570.1	abscisic acid；ethylene；gibberellin	down
MsG0480021764.01	AT3G03450.1	abscisic acid；ethylene；gibberellin	down
Medicago_sativa_newGene_2384	AT2G06850.1	auxin	down
Medicago_sativa_newGene_5135	AT4G31500.1	auxin	down
MsG0180001113.01	AT1G70940.1	auxin	down
MsG0180004743.01	AT1G09540.1	auxin	down
MsG0280008692.01	AT2G34680.1	auxin	down
MsG0480022138.01	AT2G01420.2	auxin	down
MsG0580024936.01	AT4G36740.1	auxin	down
MsG0580027927.01	AT5G49980.1	auxin	down
MsG0580028330.01	AT2G22670.4	auxin	down
MsG0680030746.01	AT3G28860.1	auxin	down
MsG0780040460.01	AT1G73590.1	auxin	down
MsG0680030784.01	AT5G15310.1	auxin；ethylene；gibberellin；jasmonic acid；salicylic acid	down
MsG0380017666.01	AT4G32880.1	auxin；gibberellin	down
MsG0480020792.01	AT4G32880.1	auxin；gibberellin	down
MsG0080048232.01	AT1G55610.1	brassinosteroid	down
MsG0180000246.01	AT5G42750.1	brassinosteroid	down
MsG0180000455.01	AT1G55610.1	brassinosteroid	down
MsG0180003780.01	AT3G13380.1	brassinosteroid	down
MsG0280006311.01	AT1G55610.1	brassinosteroid	down
MsG0280007708.01	AT1G55610.1	brassinosteroid	down
MsG0380014593.01	AT3G13380.1	brassinosteroid	down
MsG0380015693.01	AT3G13380.1	brassinosteroid	down
MsG0380016479.01	AT4G39400.1	brassinosteroid	down
MsG0380016713.01	AT4G39400.1	brassinosteroid	down
MsG0480018564.01	AT4G39400.1	brassinosteroid	down
MsG0480018919.01	AT4G00710.1	brassinosteroid	down
MsG0480019276.01	AT4G39400.1	brassinosteroid	down
MsG0480021429.01	AT4G39400.1	brassinosteroid	down
MsG0480022325.01	AT4G39400.1	brassinosteroid	down
MsG0480023626.01	AT4G39400.1	brassinosteroid	down
MsG0580024697.01	AT4G39400.1	brassinosteroid	down
MsG0580025218.01	AT1G55610.1	brassinosteroid	down
MsG0580027359.01	AT4G33430.2	brassinosteroid	down
MsG0580027798.01	AT1G16390.1	brassinosteroid	down
MsG0580030006.01	AT1G55610.1	brassinosteroid	down
MsG0680030329.01	AT2G26710.1	brassinosteroid	down
MsG0680031007.01	AT3G30180.1	brassinosteroid	down
MsG0680031108.01	AT4G33430.2	brassinosteroid	down
MsG0680033238.01	AT3G30180.1	brassinosteroid	down
MsG0780036752.01	AT1G71830.1	brassinosteroid	down
MsG0780039286.01	AT4G39400.1	brassinosteroid	down
MsG0780040509.01	AT1G55610.1	brassinosteroid	down
MsG0880045900.01	AT1G55610.1	brassinosteroid	down
MsG0780040343.01	AT3G54010.1	cytokinin	down
MsG0280008438.01	AT1G03800.1	ethylene	down
MsG0480018581.01	AT3G51770.2	ethylene	down
MsG0780040990.01	AT1G02500.1	ethylene	down
MsG0880045804.01	AT5G44790.1	ethylene	down
MsG0880047503.01	AT2G14580.1	ethylene；jasmonic acid	down
MsG0180003146.01	AT1G15520.1	ethylene；jasmonic acid；salicylic acid	down
Medicago_sativa_newGene_3203	AT1G05160.1	gibberellin	down
MsG0280011033.01	AT2G37640.1	gibberellin	down
MsG0380014966.01	AT1G69530.3	gibberellin	down
MsG0380014967.01	AT1G69530.3	gibberellin	down
MsG0380016720.01	AT1G69530.3	gibberellin	down
MsG0380016721.01	AT1G69530.3	gibberellin	down
MsG0580026206.01	AT1G69530.3	gibberellin	down
MsG0680033961.01	AT5G27320.1	gibberellin	down
MsG0780036252.01	AT5G15230.1	gibberellin	down
MsG0780038744.01	AT2G37630.1	gibberellin；jasmonic acid	down
MsG0180003268.01	AT2G26690.1	jasmonic acid	down
MsG0580024502.01	AT2G26690.1	jasmonic acid	down
MsG0580029820.01	AT4G26850.1	jasmonic acid	down
MsG0780040579.01	AT5G05580.1	jasmonic acid	down
MsG0880042456.01	AT5G24780.1	jasmonic acid	down
MsG0280011406.01	AT2G14560.1	salicylic acid	down
MsG0380015896.01	AT2G43820.1	salicylic acid	down
MsG0580028897.01	AT2G37710.1	salicylic acid	down
MsG0780040281.01	AT5G40990.1	salicylic acid	down
MsG0780040887.01	AT4G14400.1	salicylic acid	down
MsG0180000546.01	AT5G51760.1	abscisic acid	up
MsG0180001050.01	AT4G34131.1	abscisic acid	up
MsG0180001670.01	AT5G01810.1	abscisic acid	up
MsG0280008743.01	AT2G18790.1	abscisic acid	up
MsG0280009630.01	AT1G69270.1	abscisic acid	up
MsG0380014163.01	AT4G23650.1	abscisic acid	up
MsG0380016275.01	AT1G52920.1	abscisic acid	up
MsG0380016629.01	AT4G23650.1	abscisic acid	up
MsG0480021859.01	AT4G18780.1	abscisic acid	up
MsG0480023291.01	AT5G66880.1	abscisic acid	up
MsG0480023413.01	AT5G64750.1	abscisic acid	up
MsG0480023536.01	AT1G35670.1	abscisic acid	up
MsG0580024567.01	AT5G67030.1	abscisic acid	up
MsG0580027881.01	AT4G33950.1	abscisic acid	up
MsG0580029885.01	AT3G59220.1	abscisic acid	up
MsG0680030695.01	AT3G28580.1	abscisic acid	up
MsG0680035588.01	AT3G50970.1	abscisic acid	up
MsG0780038123.01	AT3G21780.1	abscisic acid	up
MsG0780038135.01	AT3G21780.1	abscisic acid	up
MsG0780039504.01	AT3G26830.1	abscisic acid	up
MsG0780041740.01	AT3G21780.1	abscisic acid	up
MsG0880041985.01	AT2G26290.1	abscisic acid	up
MsG0880043511.01	AT1G30100.1	abscisic acid	up
MsG0880044354.01	AT4G27410.3	abscisic acid	up
MsG0880044656.01	AT1G80080.1	abscisic acid	up
MsG0480024016.01	AT5G37770.1	abscisic acid；auxin	up
MsG0580024829.01	AT5G37770.1	abscisic acid；auxin	up
MsG0580028980.01	AT5G37770.1	abscisic acid；auxin	up
MsG0680031459.01	AT5G37770.1	abscisic acid；auxin	up
MsG0680031538.01	AT5G37770.1	abscisic acid；auxin	up
MsG0780037258.01	AT5G37770.1	abscisic acid；auxin	up
MsG0580025985.01	AT1G70000.1	abscisic acid；auxin；ethylene；gibberellin；jasmonic acid；salicylic acid	up
MsG0780041812.01	AT1G01060.1	abscisic acid；auxin；ethylene；gibberellin；jasmonic acid；salicylic acid	up
Medicago_sativa_newGene_2987	AT2G26740.1	auxin	up
MsG0080047987.01	AT1G69960.1	auxin	up
MsG0080048347.01	AT5G13930.1	auxin	up
MsG0080048351.01	AT5G13930.1	auxin	up
MsG0080048352.01	AT5G13930.1	auxin	up
MsG0180000221.01	AT4G16890.1	auxin	up
MsG0180004618.01	AT3G05630.1	auxin	up
MsG0180005356.01	AT5G13930.1	auxin	up
MsG0180005357.01	AT5G13930.1	auxin	up
MsG0180005358.01	AT5G13930.1	auxin	up
MsG0380015056.01	AT4G36800.1	auxin	up
MsG0480021358.01	AT5G18060.1	auxin	up
MsG0580025225.01	AT5G65980.1	auxin	up
MsG0580025440.01	AT2G06850.1	auxin	up
MsG0680034637.01	AT4G16890.1	auxin	up
MsG0680034794.01	AT4G16890.1	auxin	up
MsG0680035153.01	AT4G16890.1	auxin	up
MsG0680035200.01	AT4G16890.1	auxin	up
MsG0680035215.01	AT4G16890.1	auxin	up
MsG0780039502.01	AT4G31500.1	auxin	up
MsG0880045055.01	AT2G06850.1	auxin	up
MsG0880047495.01	AT5G57560.1	auxin；brassinosteroid	up
MsG0880047496.01	AT5G57560.1	auxin；brassinosteroid	up
Medicago_sativa_newGene_10509	AT1G71830.1	brassinosteroid	up
Medicago_sativa_newGene_1340	AT1G55610.1	brassinosteroid	up
MsG0180004744.01	AT2G26710.1	brassinosteroid	up
MsG0180004965.01	AT1G55610.1	brassinosteroid	up
MsG0280006832.01	AT1G22300.1	brassinosteroid	up
MsG0280006919.01	AT4G39400.1	brassinosteroid	up
MsG0280009856.01	AT2G26710.1	brassinosteroid	up
MsG0280009858.01	AT2G26710.1	brassinosteroid	up
MsG0380013047.01	AT4G39400.1	brassinosteroid	up
MsG0380015506.01	AT1G55610.1	brassinosteroid	up
MsG0380016643.01	AT1G55610.1	brassinosteroid	up
MsG0380016644.01	AT4G39400.1	brassinosteroid	up
MsG0380017690.01	AT3G13380.1	brassinosteroid	up
MsG0480019726.01	AT1G55610.1	brassinosteroid	up
MsG0480021702.01	AT4G30610.1	brassinosteroid	up
MsG0480022572.01	AT3G13380.1	brassinosteroid	up
MsG0480022579.01	AT4G39400.1	brassinosteroid	up
MsG0780039576.01	AT2G45400.1	brassinosteroid	up
MsG0880042049.01	AT1G71830.1	brassinosteroid	up
MsG0880043781.01	AT3G13380.1	brassinosteroid	up
MsG0880044208.01	AT4G30610.1	brassinosteroid	up
MsG0880044264.01	AT1G55610.1	brassinosteroid	up
MsG0880044284.01	AT3G13380.1	brassinosteroid	up
MsG0880047235.01	AT1G55610.1	brassinosteroid	up
MsG0380015850.01	AT3G48100.1	cytokinin	up
MsG0380017035.01	AT1G28230.1	cytokinin	up
MsG0480023732.01	AT1G78240.1	cytokinin	up
MsG0880046376.01	AT3G48100.1	cytokinin	up
Medicago_sativa_newGene_9509	AT1G05850.1	cytokinin；salicylic acid	up
Medicago_sativa_newGene_7369	AT5G19880.1	ethylene	up
MsG0180000602.01	AT2G25490.1	ethylene	up
MsG0180004525.01	AT1G08720.1	ethylene	up
MsG0180004984.01	AT3G46060.1	ethylene	up
MsG0480022812.01	AT5G44790.1	ethylene	up
MsG0780039769.01	AT3G61510.1	ethylene	up
MsG0880042140.01	AT5G44790.1	ethylene	up
MsG0880042215.01	AT5G44790.1	ethylene	up
MsG0780039740.01	AT4G01370.1	ethylene;jasmonic acid	up
MsG0480021653.01	AT5G05170.1	ethylene；jasmonic acid	up
MsG0280011348.01	AT1G15520.1	ethylene；jasmonic acid；salicylic acid	up
MsG0280011350.01	AT1G15520.1	ethylene；jasmonic acid；salicylic acid	up
MsG0080048057.01	AT4G30270.1	gibberellin	up
MsG0180001152.01	AT4G25420.1	gibberellin	up
MsG0180004772.01	AT1G02400.1	gibberellin	up
MsG0180004920.01	AT3G63010.1	gibberellin	up
MsG0380013349.01	AT1G15550.1	gibberellin	up
MsG0780036647.01	AT5G51810.1	gibberellin	up
MsG0780040621.01	AT3G63010.1	gibberellin	up
MsG0880047408.01	AT4G30270.1	gibberellin	up
Medicago_sativa_newGene_9945	AT2G06050.2	jasmonic acid	up
MsG0180000009.01	AT1G20510.1	jasmonic acid	up
MsG0280007019.01	AT2G34600.1	jasmonic acid	up
MsG0280009636.01	AT4G22880.1	jasmonic acid	up
MsG0380011901.01	AT2G34810.1	jasmonic acid	up
MsG0380012400.01	AT1G76690.1	jasmonic acid	up
MsG0380015024.01	AT1G19640.1	jasmonic acid	up
MsG0480018132.01	AT4G05160.1	jasmonic acid	up
MsG0480019034.01	AT2G33150.1	jasmonic acid	up
MsG0480019546.01	AT2G26690.1	jasmonic acid	up
MsG0580024170.01	AT1G76690.1	jasmonic acid	up
MsG0580024178.01	AT1G76690.1	jasmonic acid	up
MsG0580026032.01	AT2G26690.1	jasmonic acid	up
MsG0580027724.01	AT4G22880.1	jasmonic acid	up
MsG0780036759.01	AT3G25780.1	jasmonic acid	up
MsG0780039247.01	AT5G05580.1	jasmonic acid	up
MsG0780039248.01	AT5G05580.1	jasmonic acid	up
MsG0880042776.01	AT1G72450.1	jasmonic acid	up
MsG0880047354.01	AT2G06050.2	jasmonic acid	up
MsG0380015227.01	AT3G61250.1	jasmonic acid;salicylic acid	up
MsG0180003240.01	AT3G11820.1	jasmonic acid；salicylic acid	up
MsG0180004898.01	AT1G28480.1	jasmonic acid；salicylic acid	up
MsG0280010791.01	AT1G28480.1	jasmonic acid；salicylic acid	up
Medicago_sativa_newGene_7795	AT2G29420.1	salicylic acid	up
Medicago_sativa_newGene_7796	AT2G29420.1	salicylic acid	up
MsG0180002272.01	AT2G29420.1	salicylic acid	up
MsG0180002989.01	AT2G37710.1	salicylic acid	up
MsG0180004941.01	AT2G29420.1	salicylic acid	up
MsG0180005669.01	AT4G05320.2	salicylic acid	up
MsG0380015369.01	AT1G21250.1	salicylic acid	up
MsG0380017368.01	AT1G80840.1	salicylic acid	up
MsG0480018188.01	AT1G80840.1	salicylic acid	up
MsG0480018904.01	AT2G29420.1	salicylic acid	up
MsG0480023109.01	AT2G29420.1	salicylic acid	up
MsG0680035309.01	AT2G29420.1	salicylic acid	up
MsG0780038925.01	AT2G29420.1	salicylic acid	up
MsG0780038930.01	AT2G29420.1	salicylic acid	up
MsG0780038936.01	AT2G29420.1	salicylic acid	up
MsG0780039837.01	AT5G33340.1	salicylic acid	up
MsG0780039877.01	AT2G43820.1	salicylic acid	up
MsG0880042810.01	AT5G40990.1	salicylic acid	up
MsG0880043280.01	AT3G61190.1	salicylic acid	up
